# Supplementary material
Source: PubMed Central journal article supplement (PMC10120885)
Supplement: NIHMS1843094-supplement-supp.pdf [file NIHMS1843094-supplement-supp.pdf]

## Supplemental Material

### The coalescent process

If we consider a given pair of alleles in our sample of  $n$  and ignore any recombination within the locus, the probability that they both originate from a common ancestral allele in the previous is  $1/(2N_e)$ ; this is a “coalescent event”. If  $n$  is  $\ll N_e$ , there is a negligible chance that two such events occur in the same generation, and the probability of a coalescent event is then  $n(n-1)/(4N_e)$ . The expected time to such an event is  $4N_e/n(n-1)$ , which is equal to  $2N_e$  for the case of a single pair of alleles; there is an approximately exponential distribution around this mean (with standard deviation equal to the mean). Once this event has occurred, the process repeats itself with a rate parameter  $(n-1)(n-2) \dots (n-i)/(4N_e)$ , until the number of alleles becomes one, so that the most recent common ancestor (MRCA) of the sample has been reached.

This process generates a gene tree; all variability in the sample arises from mutations that occurred after the MRCA, and the frequency spectrum is determined by the places in the genealogy at which these mutations arose (see Figure 1). The expectation of the pairwise diversity,  $\pi$ , simply reflects the product of the mutation rate and mean time separating a pair of alleles ( $4N_e$ ). The expected number of polymorphic sites in the sample is given by the product of  $u$  and the expectation of the sum of the lengths of all the individual branches in the tree (see Figure 1); this sum is equal to  $4N_e a_n$ , which provides the rationale for the use of  $\theta_w$  as a measure of variability. Recombination has no effect on these expectations, but greatly reduces the variances of the two estimates of diversity, which reflect the considerable stochasticity of the exponential distributions of coalescent times for each branch.

In many cases it is of interest to know which of the two variants at a site represents the ancestral or derived state, which can be done by comparison with an outgroup species, although this is fraught with technical difficulties (Keightley and Jackson 2018). We can then estimate the “unfolded” SFS, where  $g_j$  is the frequency of sites with  $j$  copies of the derived variant. The expected unfolded SFS is given by  $g_j = (j a_n)^{-1}$ , which provides a benchmark against which deviations from the equilibrium model can be tested, as does the comparison of the summary statistics  $\pi$  and  $\theta_w$  obtained from the data.

Keightley PD, Jackson BC. 2018. Inferring the probability of the derived vs. the ancestral allelic state at a polymorphic site. *Genetics* 209:897–906

### **Additional references to studies of the effects of selection at linked sites**

#### **Notes:**

This is not intended as a complete bibliography of the relevant literature. Charlesworth & Campos (2014) provide a list of references to empirical work on the effects of recombination rate on molecular variation and evolution in *Drosophila*. Stephan (2019) provides a list of references to the theoretical and empirical literature on selective sweeps.

Many other relevant references that are not provided in the list below can be found in these papers, and in: Charlesworth B, Charlesworth D, Barton NH. 2003 *Ann. Rev. Ecol. Evol. Syst.* 34:99-125; Neher R. 2013. *Ann. Rev. Ecol. Evol. Syst.* 44:195-215.

Agrawal AF, Hartfield M. 2016. Coalescence with background and balancing selection in systems with bi- and uniparental reproduction: Contrasting partial asexuality and selfing. *Genetics* 202:313-26

Bachtrog D. 2008. The temporal dynamics of processes underlying Y chromosome degeneration. *Genetics* 179:1513-25

Barton NH. 1995. Linkage and the limits to natural selection. *Genetics* 140:821-41

Barton NH. 1998. The effect of hitch-hiking on neutral genealogies. *Genet. Res.* 72:123-34

Barton NH. 2010. Genetic linkage and natural selection. *Phil. Trans. R. Soc. B.* 365:2559-69

Barton NH, Etheridge AM. 2004. The effect of selection on genealogies. *Genetics* 166:1115-31

Barton NH, Etheridge AM, Kelleher J, Véber A. 2013. Genetic hitchhiking in spatially extended populations. *Theor. Pop. Biol.* 87:75-89

Berg JJ, Coop G. 2015. A coalescent model for a sweep of a unique standing variant. *Genetics* 201:707-25

Berg OG. 1995. Periodic selection and hitchhiking in a bacterial population. *J. Theor. Biol.* 173:307-20

Berlin S, Tomaras D, Charlesworth B. 2007. Low mitochondrial variability in birds may indicate Hill–Robertson effects on the W chromosome. *Heredity* 99

Bersabé D, Caballero A, Pérez-Figueroa A, García-Dorado A. 2016. On the consequences of purging and linkage on fitness and genetic diversity. *G3* 6:171-81

Betancourt AJ, Kim Y, Orr HA. 2004. A pseudohitchhiking model of X vs. autosomal diversity. *Genetics* 168:2261-69

Birky CW, Walsh JB. 1988. Effects of linkage on rates of molecular evolution. *Proc. Natl. Acad. Sci. USA* 85:6414-18

Blath J, Cronjäger MC, Eldon B, Hammer M. 2016. The site-frequency spectrum associated with J-coalescents. *Theor. Pop. Biol.* 110:36-50

Boitard S, Schlötterer C, Futschik A. 2009. Detecting selective sweeps: A new approach based on hidden Markov models. *Genetics* 181:1567-78

Booker TR, Keightley PD. 2018. Understanding the factors that shape patterns of nucleotide diversity in the house mouse genome. *Mol. Biol. Evol.* 35:2971-88

Bossert S, Pfaffelhuber P. 2013. The Yule approximation for the site frequency spectrum after a selective sweep. *PLoS One* 8:e81738

- Brunet E, Rouzine IM, Wilke CO. 2008. The traveling-wave approach to asexual evolution: Muller's ratchet and speed of adaptation. *Theor. Pop. Biol.* 73:24-46
- Butcher D. 1995. Muller's ratchet, epistasis and mutation effects. *Genetics* 141:431-37
- Cai JJ, Macpherson JM, Sella G, Petrov DA. 2009. Pervasive hitchhiking at coding and regulatory sites in humans. *PLOS Genetics* 5:e1000336
- Campos JL, Halligan DL, Haddrill PR, Charlesworth B. 2014. The relation between recombination rate and patterns of molecular evolution and variation in *Drosophila melanogaster*. *Mol. Biol. Evol.* 31:1010-28
- Castellano D, Coronado-Zamora M, Campos JL, Barbadilla A, Eyre-Walker A. 2016. Adaptive evolution is substantially impeded by Hill–Robertson interference in *Drosophila*. *Mol. Biol. Evol.* 33:442-45
- Castellano D, Eyre-Walker A, Munch C. 2020. Impact of mutation rate and selection at linked sites on DNA variation across the genomes of humans and other Homininae. *Genom. Biol. Evol.* 12:3550–61
- Charlesworth B. 1994. The effect of background selection against deleterious alleles on weakly selected, linked variants. *Genet. Res.* 63:213-28
- Charlesworth B. 1998. Measures of divergence between populations and the effect of forces that reduce variability. *Mol. Biol. Evol.* 15:538-43
- Charlesworth B. 2012a. The effects of deleterious mutations on evolution at linked sites. *Genetics* 190:1-18
- Charlesworth B. 2012b. The role of background selection in shaping patterns of molecular evolution and variation: evidence from the *Drosophila X* chromosome. *Genetics* 191:233-46
- Charlesworth B. 2013. Background Selection 20 years on: The Wilhelmine E. Key 2012 Invitational Lecture *J. Hered.* 104:161-71
- Charlesworth B, Charlesworth D. 2000. The degeneration of Y chromosomes. *Phil. Trans. R. Soc. B.* 355:1563-2572
- Charlesworth B, Jordan CY, Charlesworth D. 2014. The evolutionary dynamics of sexually antagonistic mutations in pseudoautosomal regions of sex chromosomes. *Evolution* 68:1339-50
- Charlesworth D. 2006. Balancing selection and its effects on sequences in nearby genome regions. *PLoS Genet.* 2:e2
- Charlesworth D, Morgan MT, Charlesworth B. 1993. Mutation accumulation in finite outbreeding and inbreeding populations. *Genet. Res.* 61:39-56
- Charlesworth D, Wright SI. 2001. Breeding systems and genome evolution. *Curr. Opin. Genet. Dev.* 11:685-90
- Chevin L-M, Billiard S, Hospital F. 2008. Hitchhiking both ways: Effect of two interfering selective sweeps on linked neutral variation. *Genetics* 180:301-16
- Comeron JM. 2014. Background selection as baseline for nucleotide variation across the *Drosophila* genome. *PLoS Genetics* 10:e1004434
- Comeron JM, Guthrie TB. 2005. Intragenic Hill-Robertson interference influences selection on synonymous mutations in *Drosophila*. *Mol. Biol. Evol.* 22:2519-30
- Comeron JM, Williford A, Kliman RM. 2008. The Hill-Robertson effect: evolutionary consequences of weak selection in finite populations. *Heredity* 100:19-31
- Coop G, Ralph P. 2012. Patterns of neutral diversity under general models of selective sweeps. *Genetics* 192:205-24
- Corbett-Detig RB, Hartl DL, Sackton TB. 2015. Natural selection constrains neutral diversity across a wide range of species. *PloS Biology* 13:e1002112
- Coughlan JM, Matute DR. 2020. The importance of intrinsic postzygotic barriers throughout the speciation process. *Phil. Trans. R. Soc. B* 375:20190533

- Desai M, Fisher DS. 2007. Beneficial mutation-selection balance and the effect of linkage on positive selection. *Genetics* 176:1759-98
- Durrett R, Schweinsberg J. 2004. Approximating selective sweeps. *Theor. Pop. Biol.* 66:129-38
- Durrett R, Schweinsberg J. 2005. A coalescent model for the effect of advantageous mutations on the genealogy of a population. *Stoch. Proc. Applic.* 115:1268-657
- Dyer KA, Charlesworth B, Jaenike J. 2007. Chromosome-wide linkage disequilibrium as a consequence of meiotic drive. *Proc. Natl. Acad. Sci. USA* 104:1587-92
- Eldon W, Wakeley J. 2006. Coalescent processes when the distribution of offspring number among individuals is highly skewed. *Genetics* 172:2621-33
- Etheridge AM, Pfaffelhuber P, Wakolbinger A. 2006. An approximate sampling formula under genetic hitchhiking. *Ann. Appl. Prob.* 16:685-729
- Ewing GB, Hermisson J, Pfaffelhuber P. 2011. Selective sweeps for recessive alleles and other modes of dominance. *J. Math. Biol.* 63:399-431
- Frankham R. 2012. How closely does genetic diversity in finite populations conform to predictions of neutral theory? Large deficits in regions of low recombination. *Heredity* 108:167-78
- Frydenberg O. 1963. Population studies of a lethal mutant in *Drosophila melanogaster*. I. Behaviour in populations with discrete generations. *Hereditas* 50:89-116
- Gabriel W, Lynch M, Bürger R. 1993. Muller's ratchet and mutational meltdowns. *Evolution* 47:1744-57
- Garud NR, Petrov DA. 2016. Elevated linkage disequilibrium and signatures of soft sweeps are common in *Drosophila melanogaster*. *Genetics* 203:863-60
- Gessler DG. 1995. The constraints of finite size in asexual populations and the rate of the ratchet. *Genet. Res.* 66:241-53
- Gillespie JH. 2001. Is the population size of a species relevant to its evolution? *Evolution* 55:2161-69
- Gillespie JH. 2002. Genetic drift in an infinite population: the pseudohitchhiking model. *Genetics* 155:909-19
- Gilligan DM, Briscoe DA, Frankham R. 2005. Comparative losses of quantitative and molecular genetic variation in finite populations of *Drosophila melanogaster*. *Genet. Res.* 85:47-77
- Good B, H., Desai MM. 2013. Fluctuations in fitness distributions and the effects of weak linked selection on sequence evolution. *Theor. Pop. Biol.* 85:86-102
- Gordo I, Charlesworth B. 2000a. The degeneration of asexual haploid populations and the speed of Muller's ratchet. *Genetics* 154:1379-87
- Gordo I, Charlesworth B. 2000b. On the speed of Muller's ratchet. *Genetics* 156:2137-40
- Gordo I, Charlesworth B. 2001. The speed of Muller's ratchet with background selection, and the degeneration of Y chromosomes. *Genet. Res.* 78:149-62
- Gordo I, Navarro A, Charlesworth B. 2002. Muller's ratchet and the pattern of variation at a neutral locus. *Genetics* 161:835-48
- Guttman DS, Dykhuizen DE. 1994. Detecting selective sweeps in naturally occurring *Escherichia coli*. *Genetics* 116:153-59
- Haigh J. 1978. The accumulation of deleterious genes in a population. *Theor. Pop. Biol.* 14:251-67
- Haldane JBS. 1949. The association of characters as a result of inbreeding. *Ann. Eugen.* 15:15-23
- Hammer MF, Woerner AE, Mendez FL, Watkins JC, Cox MP, Wall JD. 2010. The ratio of human X chromosome to autosome diversity is positively correlated with genetic distance from genes. *Nature Genet.* 42:830-31

- Hansson B, Westerberg L. 2002. On the correlation between heterozygosity and fitness in natural populations. *Mol. Ecol.* 11:2467-74
- Harr B, Kauer M, Schlotterer C. 2002. Hitchhiking mapping: a population-based fine-mapping strategy for adaptive mutations in *Drosophila melanogaster*. *Proc. Natl. Acad. Sci. USA* 99:12949–54
- Hartfield M, Otto SP. 2011. Recombination and the hitchhiking of deleterious alleles. *Evolution* 65:2421-34
- Hernandez R, Kelley JL, Elyashiv E, Melton SC, Auton A, et al. 2011. Classic selective sweeps were rare in recent human evolution. *Science* 331:920-24
- Higgs PG, Woodcock G. 1995. The accumulation of mutations in asexual populations and the structure of genealogical trees in the presence of selection. *J. Math. Biol.* 33:677-702
- Hollister JD, Greiner S, Wang W, Wang J, Zhang Y, et al. 2015. Recurrent loss of sex is associated with accumulation of deleterious mutations in *Oenothera*. *Mol. Biol. Evol.* 32:896-905
- Hough J, Wang W, Barrett SCH, Wright SI. 2017. Hill-Robertson interference reduces genetic diversity on a young plant Y-chromosome. *Genetics* 207:685-95
- Hudson RR, Kaplan NL. 1988. The coalescent process in models with selection and recombination. *Genetics* 120:831-40
- Innan H, Stephan W. 2003. Distinguishing the hitchhiking and background selection models. *Genetics* 165:2307-12
- Jensen JD, Payseur BA, Stephan W, Aquadro CF, Lynch M, et al. 2019. The importance of the neutral theory in 1968 and 50 years on: a response to Kern and Hahn 2018. *Evolution* 73:111–14
- Johnson T. 1999. Beneficial mutations, hitchhiking and the evolution of mutation rates in sexual populations. *Genetics* 151:1621-31
- Johnson T, Barton NH. 2002. The effect of deleterious alleles on adaptation in asexual populations. *Genetics* 162:395-411
- Jones DA, Wakeley J. 2008. The influence of gene conversion on linkage disequilibrium around a selective sweep. *Genetics* 180:1251-359
- Kamran-Disfani A, Agrawal AF. 2014. Selfing, adaptation and background selection in finite populations. *J. Evol. Biol.* 27:1360-71
- Kern AD, Hahn MW. 2018. The neutral theory in light of natural selection. *Mol. Biol. Evol.* 35:1366-71
- Kim Y. 2004. Effect of strong directional selection on weakly selected mutations at linked sites: implication for synonymous codon usage. *Mol. Biol. Evol.* 21:286-94
- Kim Y. 2006. Allele frequency distribution under recurrent selective sweeps. *Genetics* 172:1967-78
- Kim Y, Stephan W. 2003. Selective sweeps in the presence of interference among selected loci. *Genetics* 164:389-98
- Kondrashov AS. 1994. Muller's ratchet under epistatic selection. *Genetics* 136:1469-73
- Loewe L. 2006. Quantifying the genomic decay paradox due to Muller's ratchet in human mitochondrial DNA. *Genet. Res.* 87:133-59
- Loewe L, Charlesworth B. 2007. Background selection in single genes may explain patterns of codon bias. *Genetics* 175:1381-93
- Lohmueller KE, Albrechtsen A, Li Y, Kim SY, Korneliussen T, et al. 2011. Natural selection affects multiple aspects of genetic variation at putatively neutral sites across the human genome. *PLoS Genet.* 7:e1002326
- Lynch M, Bürger R, Butcher D, Gabriel W. 1993. The mutational meltdown in asexual populations. *J. Hered.* 84:339-44

- Lynch M, Conery J, Bürger R. 1995. Mutation accumulation and the extinction of small populations. *Am. Nat.* 146:489-518
- Mackintosh A, Laetsch DR, Hayward A, Charlesworth B, Vila R, Lohse K. 2019. The determinants of genetic diversity in butterflies. *Nat. Comm.* 10:3466
- Macpherson JM, Davis JC, Sella G, Petrov DA. 2007. Genomewide spatial correspondence between nonsynonymous divergence and neutral polymorphism reveals extensive adaptation in *Drosophila*. *Genetics* 177:2083-99
- Manning JT, Thompson DJ. 1984. Muller's ratchet and the accumulation of favourable mutations. *Acta Biotheor.* 33:219-25
- Marais G, Charlesworth B, Wright SI. 2004. Recombination and base composition: the case of the highly self-fertilizing plant *Arabidopsis thaliana*. *Genome Biol.* 5:R45 1-9
- Martin G, Lambert A. 2015. A simple, semi-deterministic approximation to the distribution of selective sweeps in large populations. *Theor. Pop. Biol.* 101:40-46
- McVean GAT, Charlesworth B. 2000. The effects of Hill-Robertson interference between weakly selected mutations on patterns of molecular evolution and variation. *Genetics* 155:929-44
- Messer PW, Petrov DA. 2013. Population genomics of rapid adaptation by soft selective sweeps. *Trends. Ecol. Evol.* 28:659-69
- Montgomery ME, Woodworth LM, England PR, Briscoe DA, Frankham R. 2010. Widespread selective sweeps affecting microsatellites in *Drosophila* populations adapting to captivity: implications for captive breeding programs. *Biol. Cons.* 143:1842-49
- Moran NA. 1996. Accelerated evolution and Muller's ratchet in endosymbiotic bacteria. *Proc. Natl. Acad. Sci. USA* 93:2873-78
- Mugal CF, Nabholz B, Ellegren H. 2013. Genome-wide analysis in chicken reveals that local levels of genetic diversity are mainly governed by the rate of recombination. *BMC Genomics* 14:86
- Neher RA. 2013. Genetic draft, selective interference and population genetics of rapid adaptation. *Ann. Rev. Ecol. Evol. Syst.* 44:195-215
- Nordborg M, Charlesworth B, Charlesworth D. 1996. Increased levels of polymorphism surrounding selectively maintained sites in highly selfing species. *Proc. Roy. Soc. Lond. B.* 163:1033-39
- Nowak M, Schuster, P. 1989. Error thresholds of replication in a finite population- mutation frequencies and Muller's ratchet. *J. Theor. Biol.* 137:375-98
- Ohta T, Kimura M. 1970. Development of associative overdominance through linkage disequilibrium in finite populations. *Genet. Res.* 18:277-86
- Orozco-terWengel P. 2016. The devil is in the details: the effect of population structure on demographic inference. *Heredity* 116:349-50
- Palsson S. 2001. The effects of deleterious mutations in cyclically parthenogenetic organisms. *J. Theor. Biol.* 208:201-14
- Palsson S, Pamilo P. 1999. The effects of deleterious mutations on linked neutral variation in small populations. *Genetics* 153:475-83
- Pamilo P, Palsson S. 1998. Associative overdominance, heterozygosity and fitness. *Heredity* 81:381-89
- Peck J. 1994. A ruby in the rubbish: beneficial mutations, deleterious mutations, and the evolution of sex. *Genetics* 137:597-606
- Pennings PS, Hermisson J. 2006. Soft sweeps III: The signature of positive selection from recurrent mutation. *PLoS Genet.* 2:1998-2012
- Pfaffelhuber P, Haubold B, Wakolbinger A. 2006. Approximate genealogies under genetic hitchhiking. *Genetics* 174:1995-2008

- Phung TN, Huber CD, Lohmueller KE. 2016. Determining the effect of natural selection on linked neutral divergence across species. *PLoS Gene*. 12:e1006199
- Pool JE, Lange JD. 2018. Impacts of recurrent hitchhiking on divergence and demographic inference in *Drosophila*. *Genome Biol. Evol.* 10:1882-91
- Price MN, Arkin AP. 2015. Weakly deleterious mutations and low rates of recombination limit the impact of natural selection on bacterial genomes. *mBio* 6:e01302-15
- Przeworski M, Charlesworth B, Wall JD. 1999. Genealogies and weak purifying selection. *Mol. Biol. Evol.* 16:246-53
- Przeworski M, Coop G, Wall JD. 2005. The signature of positive selection on standing genetic variation. *Evolution* 59:2312-23
- Qiu S, Zeng K, Slotte T, Wright SI, Charlesworth D. 2011. Reduced efficacy of natural selection on codon usage bias in selfing *Arabidopsis* and *Capsella* species. *Genome Biol. Evol.* 3:868-80
- Reed FA, Aquadro CF. 2005. Fitting background selection models to levels of nucleotide variation and divergence along the human autosomes. *Genome Res.* 15:1211-21
- Robertson A. 1961. Inbreeding in artificial selection programmes. *Genet. Res.* 2:189-94
- Roze D. 2015. Effects of interference between selected loci on the mutation load, inbreeding depression and heterosis. *Genetics* 201:745-57
- Rumball W, Franklin IR, Frankham R, Sheldon BL. 1994. Decline in heterozygosity under full-sib and double first-cousin inbreeding in *Drosophila melanogaster*. *Genetics* 136:1039-49
- Santiago E, Caballero A. 2005. Variation after a selective sweep in a subdivided population. *Genetics* 169:475-83
- Santiago E, Caballero A. 2016. Joint prediction of the effective population size and the rate of fixation of deleterious mutations. *Genetics* 204:1267-79
- Schierup MH, Vekemans X, Charlesworth D. 2000. The effect of hitch-hiking on genes linked to a balanced polymorphism in a subdivided population. *Genet. Res.* 76:63-73
- Schiffels S, Szöllösi GJ, Mustonen V, Lässig M. 2011. Emergent neutrality in adaptive asexual evolution. *Genetics* 189:1361-75
- Schrider DR. 2020. Background selection does not mimic the patterns of genetic diversity produced by selective sweeps. *Genetics* 216:499-519
- Seger J, Smith WA, Perry JJ, Hunn K, Kaliszewska ZA, et al. 2010. Gene genealogies distorted by weakly interfering mutations in constant environments. *Genetics* 184:529-45
- Sella G, Petrov DA, Przeworski M, Andolfatto P. 2009. Pervasive natural selection in the *Drosophila* genome? *PLoS Genet.* 6:e1000495
- Simonsen KL, Churchill GA, Aquadro CF. 1995. Properties of statistical tests of neutrality for DNA polymorphism data. *Genetics* 141:413-29
- Singh ND, Koerich LB, Carvalho AB, Clark AG. 2014. Positive and purifying selection on the *Drosophila* Y chromosome. *Mol. Biol. Evol.* 31:2612-23
- Slatkin M, Wiehe T. 1998. Genetic hitch-hiking in a subdivided population. *Genet. Res.* 71:155-60
- Stephan W. 1995. An improved method for estimating the rate of fixation of favorable mutations based on DNA polymorphism data. *Mol. Biol. Evol.* 12:959-62
- Stephan W. 2010. Genetic hitchhiking versus background selection: the controversy and its implications. *Phil. Trans. R. Soc. B.* 365:1245-53
- Stephan W, Chao L, Smale JG. 1993. The advance of Muller's ratchet in a haploid asexual population: approximate solutions based on diffusion theory. *Genet. Res.* 61:225-32
- Stephan W, Charlesworth B, McVean GAT. 1999. The effect of background selection at a single locus on weakly selected, partially linked variants. *Genet. Res.* 73:133-46

- Stephan W, Xing L, Kirby D, Braverman JM. 1998. A test of the background selection hypothesis based on nucleotide data from *Drosophila ananassae*. *Proc. Natl. Acad. Sci. USA* 95:5649-54
- Strobeck C, Maynard Smith J, Charlesworth B. 1976. The effect of hitch-hiking on a gene for recombination. *Genetics* 82:547-58
- Sved JA. 1968. The stability of linked systems of loci with a small population size. *Genetics* 59:543-63
- Sved JA. 1971. Linkage disequilibrium and homozygosity of chromosome segments in finite populations. *Theor. Pop. Biol.* 2:125-41
- Sved JA. 1972. Heterosis at the level of the chromosome and at the level of the gene. *Theor. Pop. Biol.* 3:491-506
- Szulkin M, Bierne N, David P. 2010. Heterozygosity fitness correlations: a time for reappraisal. *Evolution* 64:1202-17
- Tachida H. 2000. DNA evolution under weak selection. *Gene* 261:3-9
- Torres R, Stetter MG, Hernandez RD, Ross-Ibarra J. 2020. The temporal dynamics of background selection in non-equilibrium populations. *Genetics* 214:1019–30
- Torres R, Szpiech ZA, Hernandez RD. 2018. Human demographic history has amplified the effects of background selection across the genome. *PLoS Genet.* 14:e1007387
- Uricchio LH, Hernandez RD. 2014. Robust forward simulations of recurrent hitchhiking. *Genetics* 97:221–36
- Uricchio LH, Petrov DA, Enard D. 2019. Exploiting selection at linked sites to infer the rate and strength of adaptation. *Nat. Ecol. Evol.* 3:977-84
- Via S, West J. 2008. The genetic mosaic suggests a new role for hitchhiking in ecological speciation. *Mol. Ecol.* 17:4334-45
- Vy HMT, Won Y-J, Kim Y. 2017. Multiple modes of positive selection shaping the patterns of incomplete selective sweeps over African populations of *Drosophila melanogaster*. *Mol. Biol. Evol.* 34:27902-2807
- Wagner GP, Gabriel W. 1990. Quantitative variation in finite parthenogenetic populations; what stops Muller's ratchet in the absence of recombination? *Evolution* 44:715-31
- Wakeley J. 2013. Coalescent theory has many new branches. *Theor. Pop. Biol.* 87:1-4
- Walczak AM, Nicolaisen LE, Plotkin JB, Desai M. 2012. The structure of genealogies in the presence of purifying selection: a fitness-class coalescent. *Genetics* 190:753-79
- Wang J, Hill WG. 1999. Effect of selection against deleterious mutations on the decline in heterozygosity at neutral loci in closely inbreeding populations. *Genetics* 153:1475-89
- Waxman D, Loewe L. 2010. A stochastic model for a single click of Muller's ratchet. *J. Theor. Biol.* 264:1120-32
- Weissman DB, Barton NH. 2012. Limits to the rate of adaptive substitution in sexual populations. *PLoS Genetics* 8:e1002740
- Weissman DB, Hallatschek O. 2014. The rate of adaptation in large sexual populations with linear chromosomes. *Genetics* 196:1167-83
- Williams JL, Hall SJG, Del Corvo M, Ballingall KT, Colli L, et al. 2016. Inbreeding and purging at the genomic level: the Chillingham cattle reveal extensive, non-random SNP heterozygosity. *Animal Genet.* 47:19-27
- Williamson SH, Hernandez R, Fledel-Alon A, Zhu L, Nielsen R, Bustamante CD. 2005. Simultaneous inference of selection and population growth from patterns of variation in the human genome. *Proceedings of the National Academy of Science of the USA* 102:7882-87
- Williamson SM, Orive ME. 2002. The genealogy of a sequence subject to purifying selection at multiple sites. *Mol. Biol. Evol.* 19:1376-84



- Wilson Sayres MA. 2018. Genetic diversity on the sex chromosomes. *Genome Biol. Evol.* 10:1064-78
- Wright SI, Kalisz S, Slotte T. 2013. Evolutionary consequences of self-fertilization in plants. *Proc. R. Soc. B* 280:20130133
- Wright SJ, Foxe JP, Wilson LD, Kawabe A, Looseley M, et al. 2006. Testing for effects of recombination rate on nucleotide diversity in natural populations of *Arabidopsis lyrata*. *Genetics* 174:1421-30
- Zeng K, Charlesworth B. 2010. The effects of demography and linkage on the estimation of selection and mutation parameters. *Genetics* 186:1411-24
- Zeng K, Charlesworth B. 2011. The joint effects of background selection and genetic recombination on local gene genealogies. *Genetics* 189:251-66
- Zeng K, Charlesworth B, Hobolth A. 2020. Studying models of balancing selection using phase-type theory. *bioRxiv* /doi.org/10.1101/2020.07.06.189837
- Zeng K, Corcoran P. 2015. The effects of background and interference selection on patterns of genetic variation in subdivided populations. *Genetics* 201:1539-54
- Zeng K, Shi S, Wu C-I. 2007. Compound tests for the detection of hitchhiking under positive selection. *Mol. Biol. Evol.* 24:1898-908
